# Supplementary material for: Interface modification of 8-hydroxyquinoline aluminium with combined effects in quasi-solid dye-sensitized solar cells
Source: Royal Society of Chemistry journal article supplement (doi:10.1039/c2cp24137d), 2012-01-01
Supplement: c2cp24137d.pdf [file c2cp24137d.pdf]

Series resistance ( $R_s$ ) was well-known as a key factor that affects the  $FF$  of a device.<sup>33</sup>  $R_s$  mainly composed of the resistance of the conductive glass, the resistance of the electron transport within  $TiO_2$  and the bulk resistance of the electrolyte. The following five equations revealed the relationship between  $FF$  and the  $R_s$ .<sup>33</sup> In equation (S1),  $R_{ch}$  represented the characteristic resistance of the solar cell. In Equation (S2),  $R_s$  and  $r_s$  represented the series resistance and the normalized series resistance, respectively. In equation (S3),  $v_{oc}$  was defined normalized  $V_{oc}$ ,  $k$  is Boltzman's constant and  $T$  is the temperature in Kelvin. In equation (S4),  $FF_0$  was denoted as the idealized fill factor.<sup>33</sup>

$$R_{ch} \approx \frac{V_{oc}}{J_{sc}} \quad (S1)$$

$$r_s = \frac{R_s}{R_{ch}} \quad (S2)$$

$$v_{oc} = \frac{q}{nkT} * V_{oc} \quad (S3)$$

$$FF_0 = \frac{v_{oc} - \ln(v_{oc} + 0.72)}{v_{oc} + 1} \quad (S4)$$

$$FF = FF_0 * (1 - r_s) \quad (S5)$$

Based on the results of Table.2, set  $n=1$ ,  $T=300$  K, and it was known that  $q=1.6*10^{-19}$ ,  $k=1.38*10^{-23}$ , after calculating of the equations above, the results was shown in Table. 3.

From equation (S1), value of  $R_{ch}$  decreased with the increase of  $J_{sc}$ . Besides, the value of  $R_s$  increased with  $Alq_3$  coating. Then from equation (S2), the value of  $r_s$  increased. Thus from equation (S5), the value of  $FF$  would decrease a lot with  $Alq_3$  coating. However, the  $FF$  only decreased from 0.62 to 0.61, nearly without any change. It could be explained that from equation (S3), the idealized fill factor of device with  $Alq_3$  coating was larger than the blank sample because enhancement of  $V_{oc}$  and  $R_s$  from the retarding of charge recombination shown in the EIS results. The two opposite effects of enhancing  $FF_0$  increasing  $FF$  and bigger  $r_s$  decreasing caused the  $FF$  did not change obviously due to equation (S5).
